# Supplementary material for: Antidiabetic Effect of Fermented Mesembryanthemum crystallinum L. in db/db Mice Involves Regulation of PI3K-Akt Pathway
Source: MDPI journal article supplement (doi:10.3390/cimb45080405), 2023-08-03
Supplement: s1 [file s1]

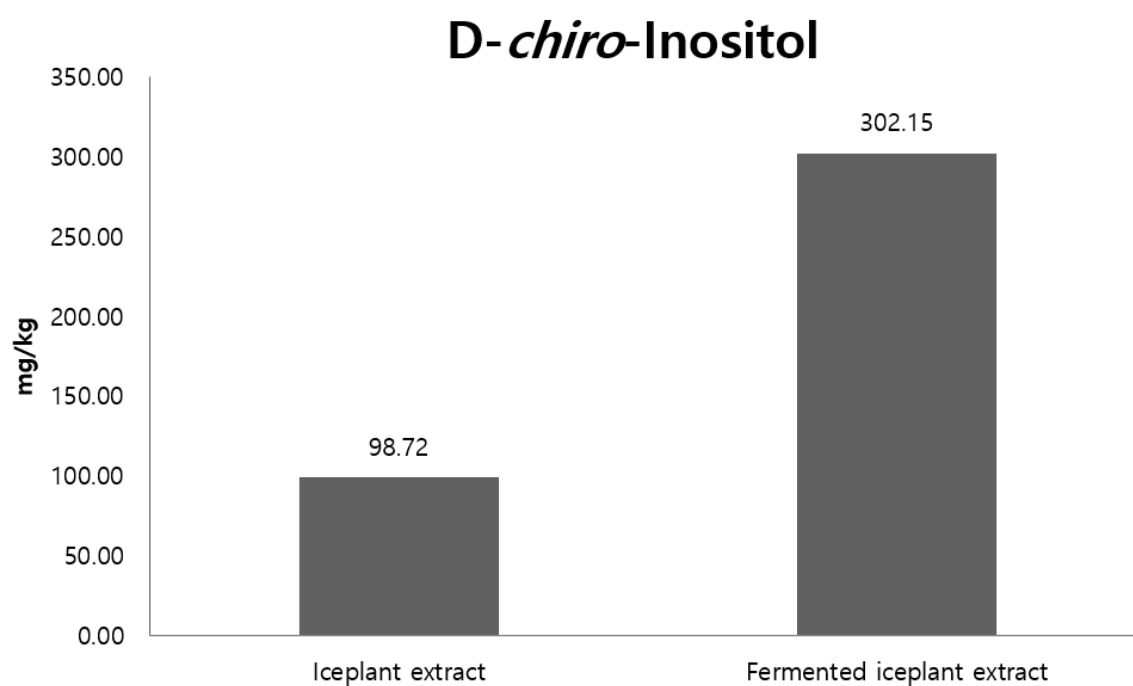

**Supplemental Fig 1.** Content of D-*chiro*-inositol after fermentation of iceplant extract.

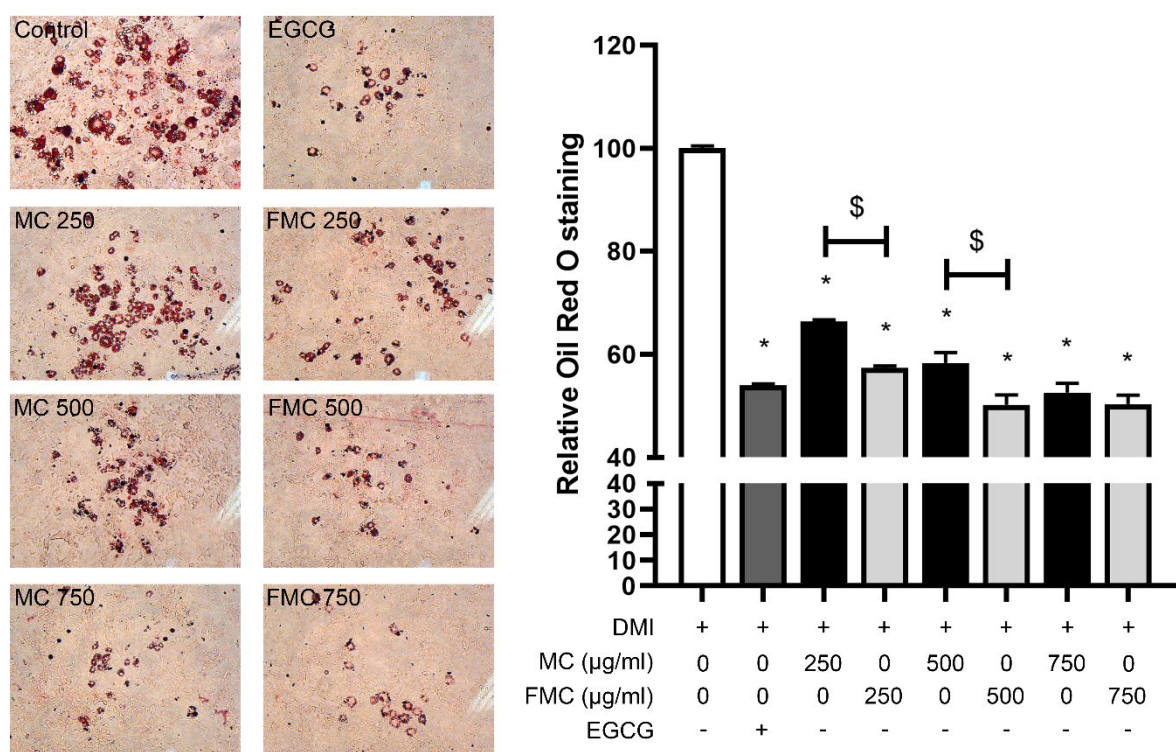

**Supplemental Fig 2.** Effect of FMC and non-fermented ice plant extract (MC) on lipid accumulation in 3T3-L1 adipocytes. \* $p < 0.05$  vs. differentiated 3T3-L1 adipocytes; \$ $p < 0.05$  between indicated groups. Results are displayed as mean  $\pm$  SD of  $n = 3$  or more.

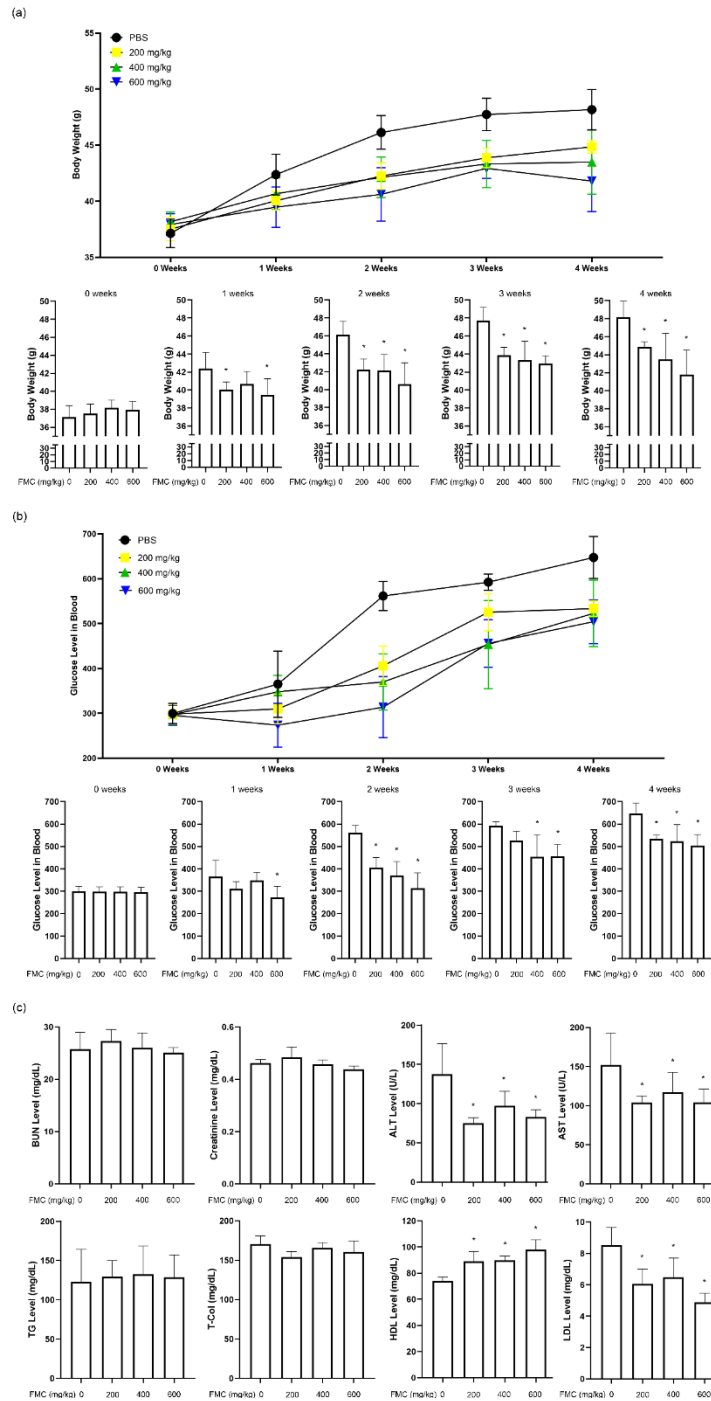

**Supplemental Fig 3.** Effect of FMC administration on food intake in *db/db* mice. (a) Body weight change and (b) serum glucose levels were measured weekly. (c) Serum levels of blood urea nitrogen (BUN), creatinine, alanine aminotransferase (ALT), aspartate aminotransferase (AST), triglyceride (TG), total cholesterol, high-density lipoprotein (HDL) cholesterol and low-density lipoprotein (LDL) cholesterol were measured after 4 weeks of study. \* $p < 0.05$  vs. *db/db* mice without FMC administration. Results are displayed as mean  $\pm$  SD of  $n = 7$  per group.

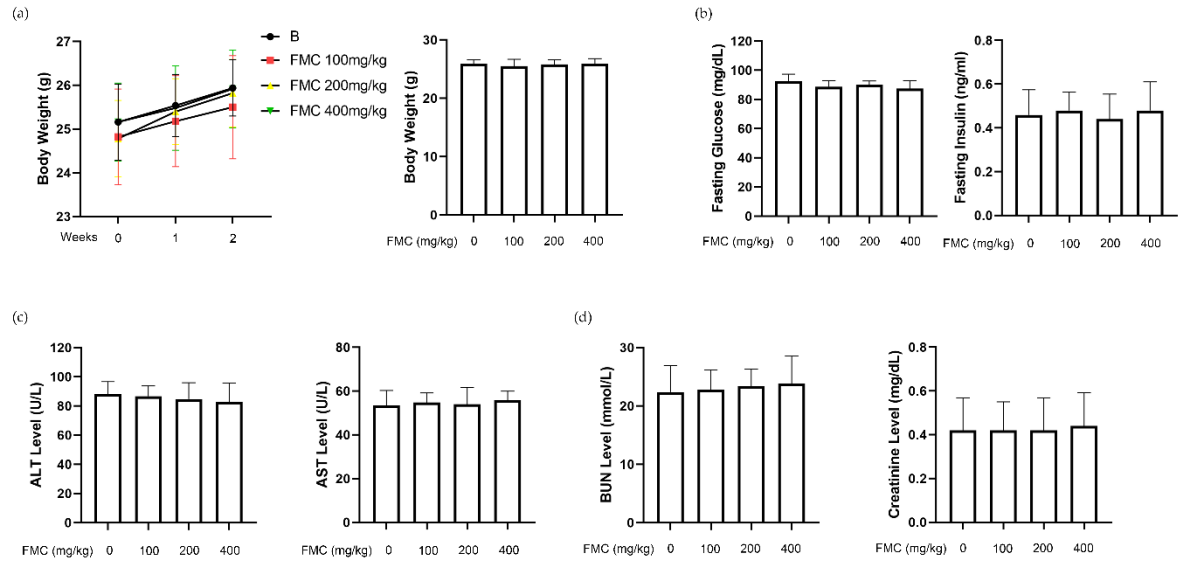

**Supplemental Fig 4.** Effect of FMC on body weight, fasting blood glucose and insulin and serum parameters in normal mice. FMC was orally administrated for 2 weeks in normal mice. After 2 weeks (a) Body weight of each group, Fasting blood glucose levels and Fasting blood insulin levels (b) BUN, (c) Creatinine, (d) ALT and (e) AST levels in serum in normal mice were measured with or without FMC administration. Results are displayed as mean  $\pm$  SD of  $n = 5$  per group.

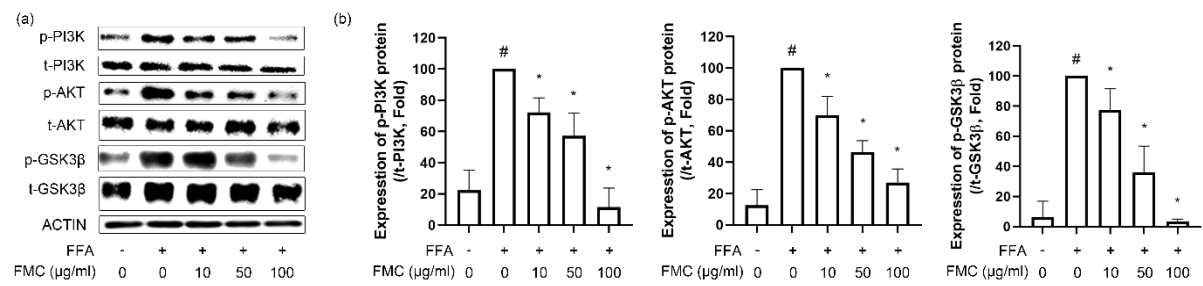

**Supplemental Fig 5.** Effect of FMC treatment on the IRS-PI3K-AKT pathway in HepG2 cells. Representative pictures show the protein levels of IRS, PI3K, AKT and GSK3 $\beta$  as confirmed by western blot analysis. <sup>#</sup> $p < 0.05$  vs. vehicle-treated cells; <sup>\*</sup> $p < 0.05$  vs. FFA-treated cells. Results are displayed as mean  $\pm$  SD of  $n = 3$  or more.

**Supplemental Table 1.** Nutritional contents of FMC.

| Nutrient compound  | Contents     | unit      |
|--------------------|--------------|-----------|
| Calories           | 376.34±0.411 | Kcal/100g |
| Total Carbohydrate | 90.57±0.065  | g/100g    |
| Total sugars       | 10.16±0.197  | g/100g    |
| Protein            | 0.95±0.005   | g/100g    |
| Total Fat          | 1.14±0.05    | g/100g    |
| Saturated Fat      | 0.01±0.006   | g/100g    |
| Trans Fat          | ND           | g/100g    |
| Cholesterol        | ND           | mg/100g   |
| Sodium             | 1155±4.359   | mg/100g   |
